# Supplementary material
Source: PubMed Central journal article supplement (PMC3131929)
Supplement: cdd2010148x2.pdf [file cdd2010148x2.pdf]

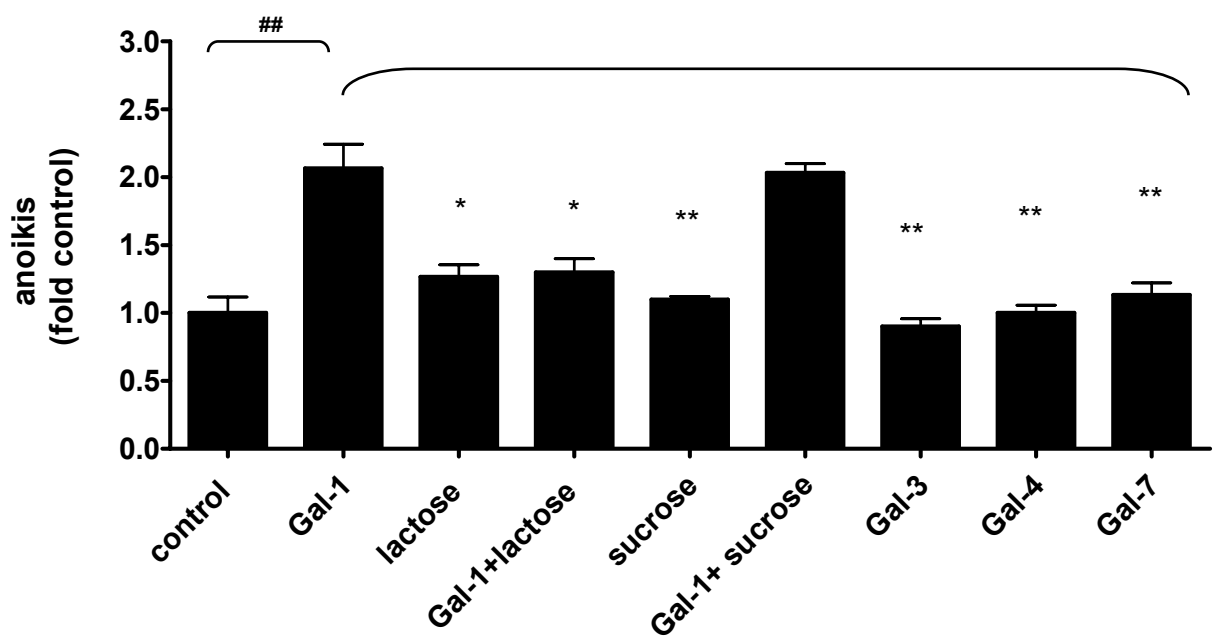

**Anoikis stimulation is galectin-type specific, lactose sensitive and restricted to Gal-1.** Anoikis rates in HepG2 cells incubated with galectins-1, -3, -4 (N-terminal domain), and -7 (125 µg/ml each) and/or lactose (20 µM) or sucrose (20µM) were determined. Data represent mean ± SEM of at least three independent experiments (\*p<0.05, \*\*p<0.01 vs. Gal-1-treated cells; ## p<0.01 vs. control).
