# Supplementary material
Source: PubMed Central journal article supplement (PMC3131929)
Supplement: cdd2010148x3.pdf [file cdd2010148x3.pdf]

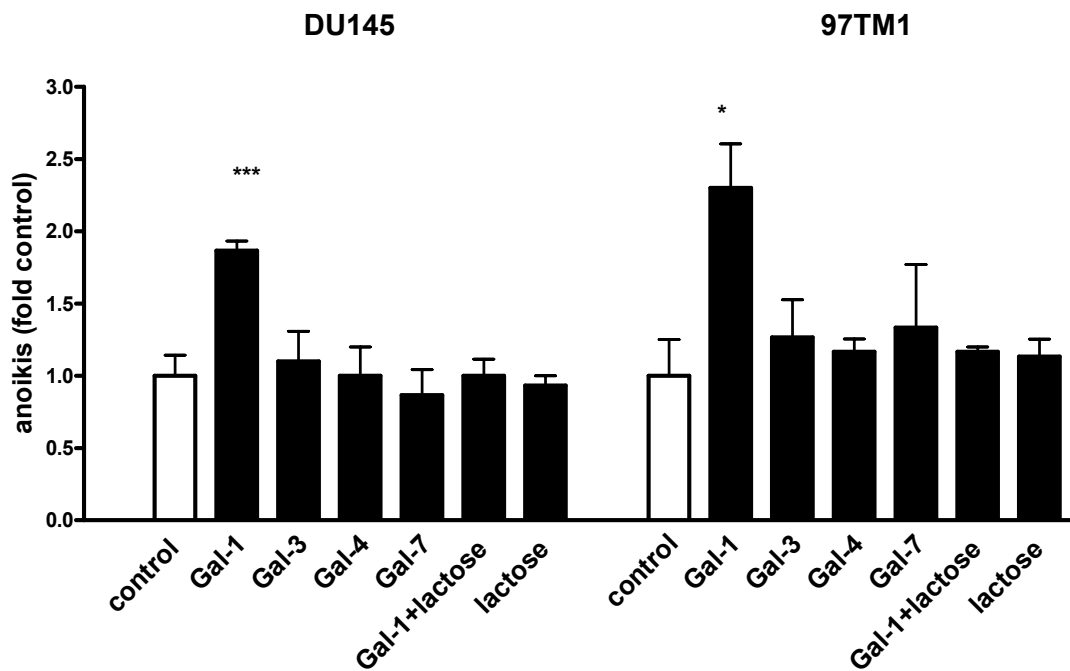

**Anoikis stimulation is galectin-type specific and restricted to Gal-1.** DU145 and 97TM1 cells were subjected to suspension culture and galectins-1, -3, -4 (N-terminal domain), and -7 (125  $\mu\text{g/ml}$  each) and/or lactose (20  $\mu\text{M}$ ) were added as indicated. Anoikis rates were determined after 24 hours. Data represents mean  $\pm$  SEM of three independent experiments. \* $p < 0.05$ , \*\*\* $p < 0.00$ .
