# Supplementary material
Source: PubMed Central journal article supplement (PMC3131929)
Supplement: cdd2010148x4.pdf [file cdd2010148x4.pdf]

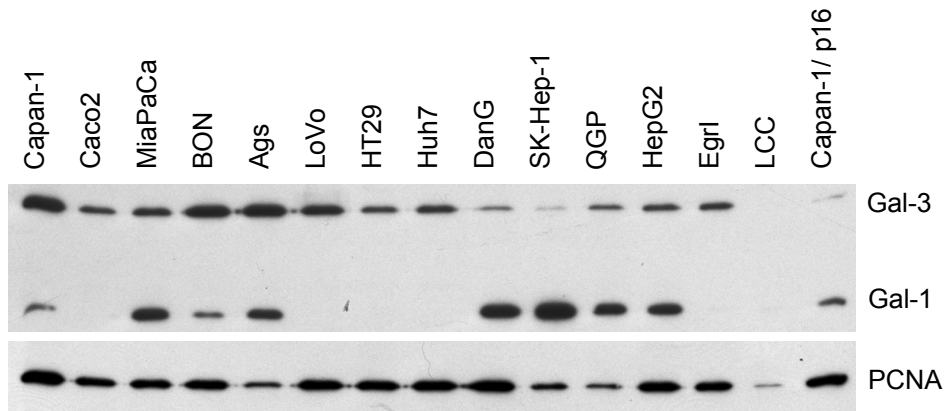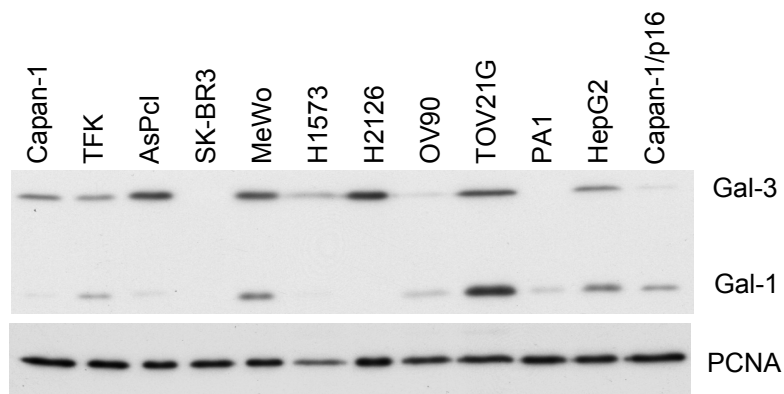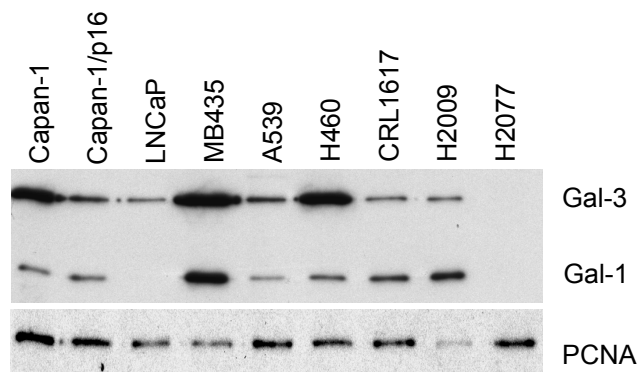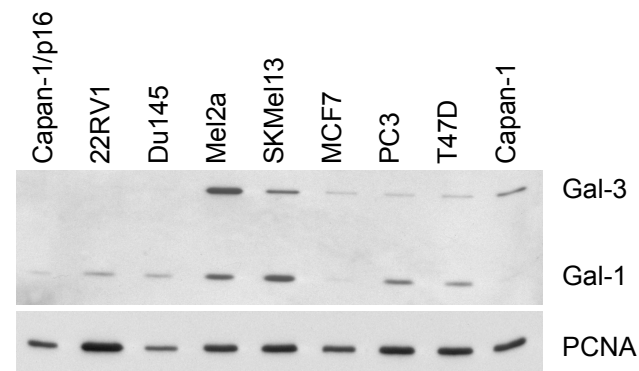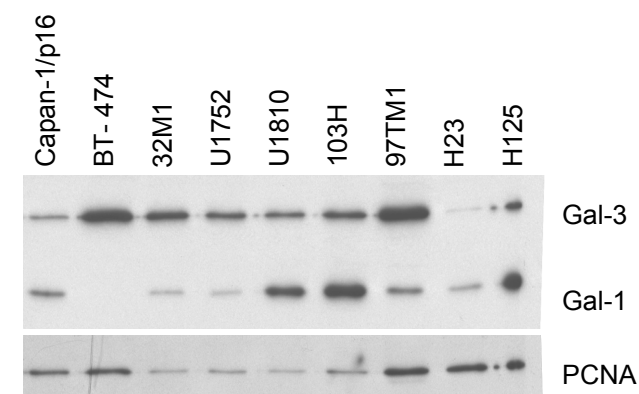

**Endogenous expression of galectin-1 and galectin-3 in human carcinoma cell lines.** Shown are Western Blot analyses of whole cell lysates with immunodetection of Gal-1 and galectin-3 (Gal-3) using a mixture of non cross-reactive antibodies to Gal-1 and Gal-3. Blots were stripped for subsequent immunodetection of PCNA to exclude gross differences in protein loading.
