# Supplementary material
Source: PubMed Central journal article supplement (PMC3131929)
Supplement: cdd2010148x5.pdf [file cdd2010148x5.pdf]

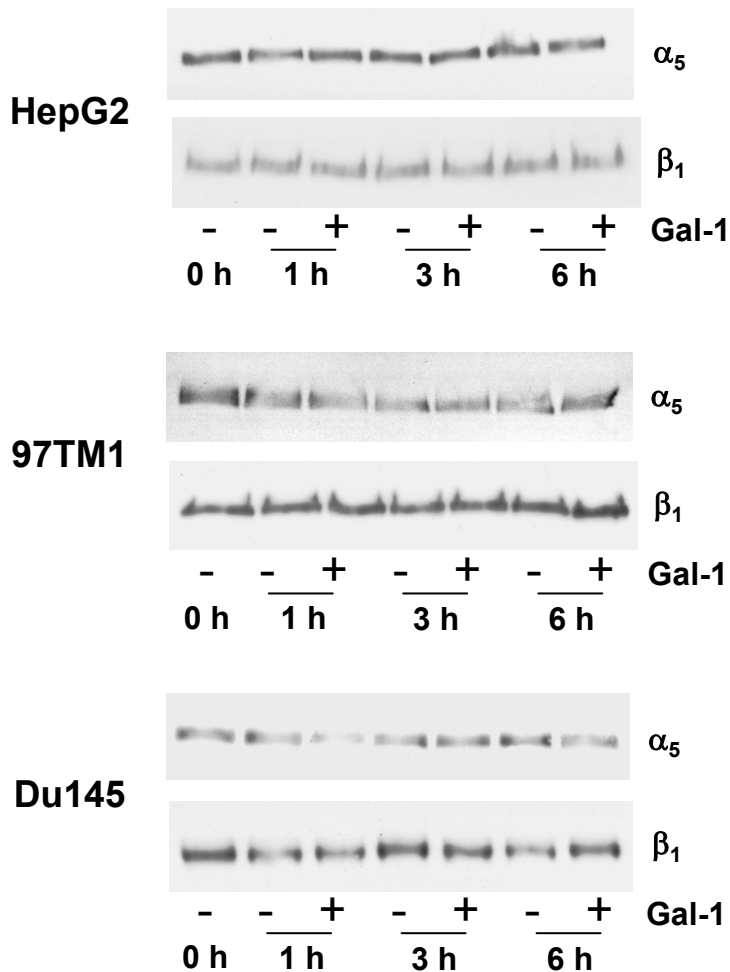

**Gal-1 treatment does not reduce  $\alpha_5\beta_1$ -integrin expression.** HepG2, 97TM1 or DU145 cells were cultured in serum-supplemented media on PolyHEMA-coated dishes and received treatment with Gal-1 (125  $\mu\text{g/ml}$ ) or vehicle for the indicated time periods. Total cell lysates were then prepared and separated by 7.5% SDS-PAGE. Immunoblots were conducted to determine the amount of  $\alpha_5$ - and  $\beta_1$ -integrin subunits.
