# Supplementary material
Source: PubMed Central journal article supplement (PMC3131929)
Supplement: cdd2010148x7.pdf [file cdd2010148x7.pdf]

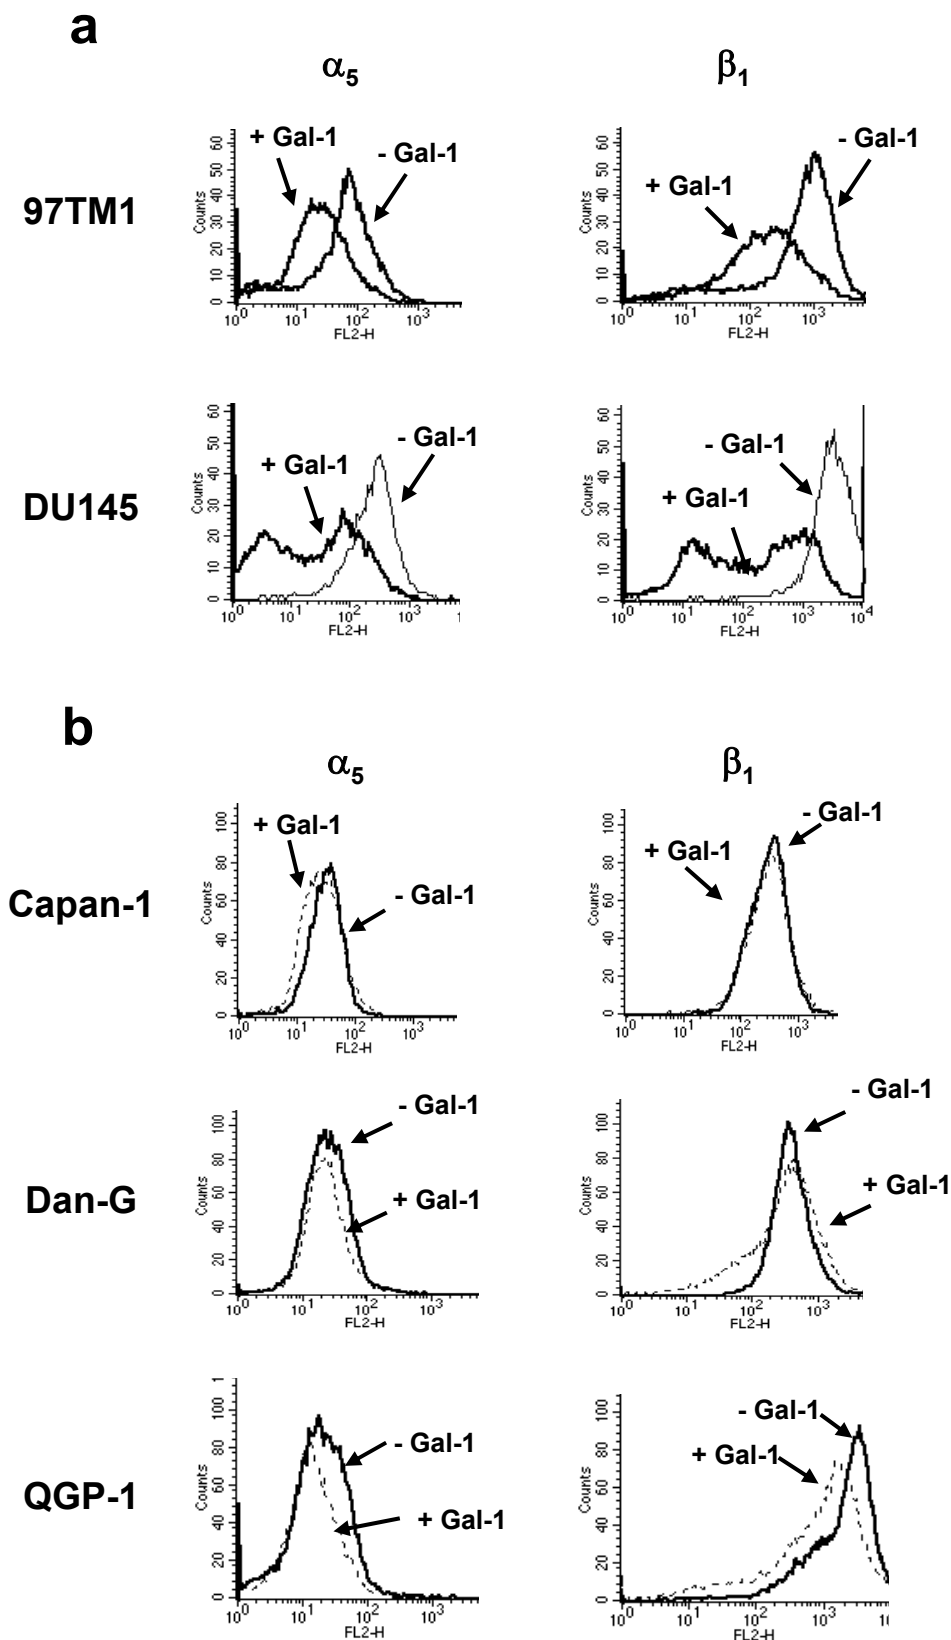

**Gal-1-induced internalization of  $\alpha_5\beta_1$ -integrin occurs in cell lines, which initiate anoikis upon Gal-1 stimulation.** Cell lines were grouped according to their susceptibility to Gal-1-stimulated anoikis: (a) responsive cell lines 97TM1 and DU145 (b) resistant cell lines Capan-1, Dan-G and QGP-1. Cells were kept on PolyHEMA-coated dishes and stimulated with 125  $\mu\text{g/ml}$  Gal-1(+Gal-1) or vehicle (-Gal-1) for 1 hour. Immunostaining for  $\alpha_5$ - and  $\beta_1$ -integrin subunits was conducted on native cells and quantitated by flow cytometry. Gal-1-stimulated  $\alpha_5\beta_1$ -internalization occurred in cell lines, which were susceptible to Gal-1-stimulated anoikis.
